# Supplementary material for: Breakfast Frequency and Composition in a Group of Polish Children Aged 7–10 Years
Source: MDPI journal article supplement (doi:10.3390/nu13072241), 2021-06-29
Supplement: s1 [file s1]

**Supplementary Table S1.** The classification of each food and drink item according to the scoring designed by the Italian research group.

| Food or beverage item                  | Category / Content of selected nutrient or product |               |                          |       |                       |             |
|----------------------------------------|----------------------------------------------------|---------------|--------------------------|-------|-----------------------|-------------|
|                                        | water                                              | carbohydrates | protein or dairy product | fiber | vitamins and minerals | free sugars |
| water                                  | 1                                                  |               |                          |       |                       |             |
| milk                                   | 1                                                  |               | 1                        |       |                       |             |
| cacao                                  | 1                                                  |               | 1                        |       |                       | - 1         |
| tea                                    | 1                                                  |               |                          |       |                       |             |
| fruit juice                            | 1                                                  |               |                          |       | 1                     |             |
| cold-pressed fruit juice               | 1                                                  |               |                          | 1     | 1                     |             |
| sweet beverage                         | 1                                                  |               |                          |       |                       | - 1         |
| sandwich with cheese or cottage cheese |                                                    | 1             | 1                        |       |                       |             |
| sandwich with ham                      |                                                    | 1             | 1                        |       |                       |             |
| sandwich with chocolate                |                                                    | 1             |                          |       |                       | - 1         |
| sandwich with jam                      |                                                    | 1             |                          |       |                       | - 1         |
| cereals                                |                                                    | 1             |                          |       |                       |             |
| sweet roll/bun                         |                                                    | 1             |                          |       |                       | - 1         |
| yogurt                                 |                                                    | 1             | 1                        |       |                       |             |
| eggs                                   |                                                    |               | 1                        |       |                       |             |
| vegetables                             |                                                    |               |                          | 1     | 1                     |             |
| fruit                                  |                                                    |               |                          | 1     | 1                     |             |

This score was designed to use together with the diary ‘Seven days for my health’ by the Italian authors: F. Catalani, D. Gibertoni, G. Lorusso, M. Rangone, L. Dallolio, S. Todelli, A. Lorenzini, D. Tiso, S. Marini, and E. Leoni [20].
